# Supplementary material for: Bacteria-Bacteriophage Cycles Facilitate Cholera Outbreak Cycles: An Indirect Susceptible - Infected - Bacteria - Phage (Isibp) Model-Based Mathematical Study
Source: Preprints.org preprint supplement (doi:10.20944/preprints202102.0357.v1), 2021-02-17
Supplement: Supplementary file 1 [file supplementary]

# **Bacteria-bacteriophage cycles facilitate Cholera outbreak cycles: an indirect Susceptible - Infected - Bacteria - Phage (iSIBP) model-based mathematical study**

Asma Al Habees<sup>1</sup>, Eman Aldabbas<sup>1</sup>, Nicola L. Bragazzi <sup>2</sup>, and Jude  
D. Kong<sup>2,3,\*</sup>

<sup>1</sup>Department of Mathematics, The University of Jordan, Jordan

<sup>2</sup>Department of Mathematics and Statistics, York University,  
Toronto, ON M3J 1P3, Canada

<sup>3</sup>Canadian Center for Diseases Modeling (CDM), York  
University, Toronto, ON M3J 1P3, Canada

\*Correspondence: jdkong@yorku.ca

February 15, 2021

# Mathematical Analysis

## 1 Existence of Equilibria with No shedding

Substituting  $\xi = 0$  in system (1) and noticing that  $R = N - S - I$ , the third equation is then not necessary. Thus, system (1) reduces to

$$\begin{aligned}
 \dot{S} &= -\alpha(B_p)S - \mu S - \eta S + \mu N + \eta N - \eta I \\
 \dot{I} &= \alpha(B_p)S - \mu I - \delta I \\
 \dot{B}_p &= r B_p \left(1 - \frac{B_p + B_{np}}{K}\right) - \gamma_1 \frac{B_p}{K_1 + B_p} P + \theta(B_{np}, P) \\
 \dot{B}_{np} &= r B_{np} \left(1 - \frac{B_p + B_{np}}{K}\right) - \gamma_2 \frac{B_{np}}{K_1 + B_{np}} P - \theta(B_{np}, P) \\
 \dot{P} &= \beta \left( \gamma_1 \frac{B_p}{K_1 + B_p} + \gamma_2 \frac{B_{np}}{K_1 + B_{np}} \right) P - dP
 \end{aligned} \tag{2}$$

By considering the values of  $\alpha(B_p)$ , we get two cases:

**Case 1:** if the pathogenic bacteria level is below or equal to the minimum infectious dose, then  $\alpha(B_p) = 0$ . Hence system (2) becomes:

$$\begin{aligned}
 \dot{S} &= -\mu S - \eta S + \mu N + \eta N - \eta I \\
 \dot{I} &= -\mu I - \delta I \\
 \dot{B}_p &= r B_p \left(1 - \frac{B_p + B_{np}}{K}\right) - \gamma_1 \frac{B_p}{K_1 + B_p} P + \theta(B_{np}, P) \\
 \dot{B}_{np} &= r B_{np} \left(1 - \frac{B_p + B_{np}}{K}\right) - \gamma_2 \frac{B_{np}}{K_1 + B_{np}} P - \theta(B_{np}, P) \\
 \dot{P} &= \beta \left( \gamma_1 \frac{B_p}{K_1 + B_p} + \gamma_2 \frac{B_{np}}{K_1 + B_{np}} \right) P - dP
 \end{aligned} \tag{3}$$

Then system (3) has 4 equilibrium points which are listed below:

1.  $E_0 = (N, 0, 0, 0, 0)$  always exists.
2.  $E_1 = (N, 0, m, K - m, 0)$  always exists, where  $m$  is a non-negative constant such that if  $K \leq c$ , then  $m \leq K$ , and if  $K > c$ , then  $m \leq c$ . Special cases of  $E_1$  are:
  - a.  $E_{11} = (N, 0, 0, K, 0)$ .
  - b.  $E_{12} = (N, 0, K, 0, 0)$ , where  $K \leq c$ .

3.  $E_2 = (N, 0, B_{p_2}, 0, P_2)$  exists if  $\beta\gamma_1 - d > 0$ . In this case,  $B_{p_2} = \frac{dK_1}{\beta\gamma_1 - d} > 0$  is such that if  $K \leq c$ , then  $B_{p_2} \leq K$ , and if  $K > c$ , then  $B_{p_2} \leq c$ , so that  $P_2 = \frac{r}{\gamma_1 K} (K_1 + B_{p_2}) (K - B_{p_2}) > 0$ .
4. The interior point  $E^* = (N, 0, B_p^*, B_{np}^*, P^*)$ , exists if the following conditions hold:
  - (i)  $B_p^* < c$ .
  - (ii)  $B_p^* \neq \frac{dK_1}{\beta\gamma_1 - d} = B_{p_2}$ . Note that the existence of  $B_p^*$  and  $B_{p_2}$  is contrary.
  - (iii)  $B_p^* \neq \frac{K_1(d - \beta\gamma_2)}{\beta(\gamma_1 + \gamma_2) - d}$ .
  - (iv)  $K > B_p^* + B_{np}^*$ .
  - (v)  $B_p^*, B_{np}^*$  and  $P^* > 0$ .

The existence of the equilibria  $E_0$  and  $E_1$  is obvious. In the following we will show the existence of equilibria  $E_2$  and  $E^*$ .

Equation (4) of system (3) implies that at steady state either  $B_{np} = 0$  or  $B_{np} \neq 0$ . Under the assumption that  $B_{np} = 0$ , one can obtain the equilibrium point  $E_2$  by solving the following system of equations:

$$0 = -\mu S - \eta S + \mu N + \eta N - \eta I \quad (1)$$

$$0 = -\mu I - \delta I \quad (2)$$

$$0 = rB_p \left(1 - \frac{B_p}{K}\right) - \gamma_1 \frac{B_p}{K_1 + B_p} P \quad (3)$$

$$0 = \beta \left( \gamma_1 \frac{B_p}{K_1 + B_p} \right) - d \quad (4)$$

From equation (2), we have  $I = 0$  and then from equation (1), we have  $S = N$ . From equation (4), we have  $d = \frac{\beta\gamma_1 B_p}{K_1 + B_p}$  so  $B_{p_2} = \frac{dK_1}{\beta\gamma_1 - d}$  such that  $B_{p_2} \leq c$  and  $\beta\gamma_1 > d$ .

From equation (3), we get  $P_2 = \frac{r}{\gamma_1 K} (K_1 + B_{p_2}) (K - B_{p_2})$ . In order to have a positive value for  $P_2$ , the following conditions on  $B_{p_2}$  must hold:

$B_{p_2} < K$  and if  $K \leq c$ , then  $B_{p_2} < K$ , and if  $K > c$ , then  $B_{p_2} \leq c$ .

If  $B_{np} \neq 0$  and  $P \neq 0$ , then the equilibrium  $E^*$  is obtained by solving the following

system of equations:

$$0 = -\mu S - \eta S + \mu N + \eta N - \eta I \quad (5)$$

$$0 = -\mu I - \delta I \quad (6)$$

$$0 = r B_p \left( 1 - \frac{B_p + B_{np}}{K} \right) - \gamma_1 \frac{B_p}{K_1 + B_p} P + \theta B_{np} P \quad (7)$$

$$0 = r \left( 1 - \frac{B_p + B_{np}}{K} \right) - \gamma_2 \frac{1}{K_1 + B_{np}} P - \theta P \quad (8)$$

$$0 = \beta \left( \gamma_1 \frac{B_p}{K_1 + B_p} + \gamma_2 \frac{B_{np}}{K_1 + B_{np}} \right) - d \quad (9)$$

Clearly,  $I = 0$  from equation (6). Thus, from equation (5), we get  $S = N$ . From equation (9), we have

$$B_{np} = \frac{x}{y} = \frac{K_1(-d(K_1 + B_p) + \beta\gamma_1 B_p)}{K_1(d - \beta\gamma_2) + B_p(d - \beta(\gamma_1 + \gamma_2))}, \quad (10)$$

where  $x = K_1[-d(K_1 + B_p) + \beta\gamma_1 B_p]$  and  $y = K_1(d - \beta\gamma_2) + B_p(d - \beta(\gamma_1 + \gamma_2))$  are such that  $B_p \neq \frac{dK_1}{\beta\gamma_1 - d} = B_{p2}$ ; otherwise  $x = 0$  but  $B_{np} > 0$ . Clearly

$B_p \neq \frac{K_1(d - \beta\gamma_2)}{\beta(\gamma_1 + \gamma_2) - d}$ . Thus, we get  $B_{np} = \frac{x}{y}$ , where either  $x, y > 0$  or  $x, y < 0$ .

In order to show that both  $x$  and  $y$  are negative, and by solving equation (8) above, we get

$$P^* = \left( \frac{r}{K} \right) (K - B_p - B_{np}) \left( \frac{K_1 + B_{np}}{\gamma_2 + \theta(K_1 + B_{np})} \right) \quad (11)$$

Since  $P^* > 0$ , then we must have  $K > B_p + B_{np}$ . Consequently, and by substituting equation (10) in equation (11), we get

$$\begin{aligned} P^* &= \left( \frac{r}{K} \right) \left( K - B_p - \frac{x}{y} \right) \left( \frac{K_1 + \frac{x}{y}}{\gamma_2 \theta (K_1 + \frac{x}{y})} \right) \\ &= \left( \frac{r}{K} \right) \left[ \frac{yK - B_p - x}{y} \right] \left[ \frac{\left( \frac{yK_1 + x}{y} \right)}{\left( \frac{y\gamma_2 + \theta(yK_1 + x)}{y} \right)} \right] \end{aligned}$$

Thus,

$$P^* = \left( \frac{r}{K} \right) \left[ \frac{yK - B_p - x}{y} \right] \left[ \frac{yK_1 + x}{y\gamma_2 + \theta(yK_1 + x)} \right], \quad (12)$$

where  $yK - yB_p - x < 0$  in order for  $P^*$  to be positive. To see that, and by simplifying  $yK_1 + x$ , we get

$$yK_1 + x = (-K_1\beta\gamma_2)(K_1 + B_p) < 0 \quad (13)$$

Thus,  $x, y < 0$ . Hence, equation (12) becomes

$$P^* = \left(\frac{r}{K}\right) \left[\frac{yK - B_p - x}{y}\right] \left[\frac{-K_1\beta\gamma_2(K_1 + B_p)}{y\gamma_2 - \theta K_1\beta\gamma_2(K_1 + B_p)}\right] \quad (14)$$

Using equation (10) and equation (14) in equation (7), we get

$$0 = \left(\frac{r}{K}\right) \left[\frac{yK - B_p - x}{y}\right] \left[B_p + \frac{\gamma_1\gamma_2 K_1\beta B_p}{(y\gamma_2 - \theta K_1\beta\gamma_2(K_1 + B_p))} - \theta\left(\frac{x}{y}\right) \left(\frac{K_1\beta\gamma_2(K_1 + B_p)}{y\gamma_2 - \theta K_1\beta\gamma_2(K_1 + B_p)}\right)\right].$$

Then

$$\left[\frac{yK - B_p - x}{y}\right] = 0 \quad (15)$$

or

$$\left[B_p + \frac{\gamma_1\gamma_2 K_1\beta B_p}{(y\gamma_2 - \theta K_1\beta\gamma_2(K_1 + B_p))} - \theta\left(\frac{x}{y}\right) \left(\frac{K_1\beta\gamma_2(K_1 + B_p)}{y\gamma_2 - \theta K_1\beta\gamma_2(K_1 + B_p)}\right)\right] = 0 \quad (16)$$

Notice that equation (15) has no solution since  $P^* > 0$ . Thus, and by using Mathematica, equation (16) has three solutions, one of which is real, say  $B_p^*$ , and the other two are imaginary. Substituting  $B_p^*$  in equation (14) to get  $P^*$  and in equation (10) to get  $B_{np}^*$ , and this proves the existence of the interior point  $E^*$ .

**Case 2:** if the pathogenic bacteria level is above the minimum infectious dose, then  $\alpha(B_p) \neq 0$ , Leaving us with the following system:

$$\begin{aligned} \dot{S} &= -\alpha(B_p)S - \mu S - \eta S + \mu N + \eta N - \eta I \\ \dot{I} &= \alpha(B_p)S - \mu I - \delta I \\ \dot{B}_p &= rB_p \left(1 - \frac{B_p + B_{np}}{K}\right) - \gamma_1 \frac{B_p}{K_1 + B_p} P + \theta B_{np} P \\ \dot{B}_{np} &= rB_{np} \left(1 - \frac{B_p + B_{np}}{K}\right) - \gamma_2 \frac{B_{np}}{K_1 + B_{np}} P - \theta B_{np} P \\ \dot{P} &= \beta \left(\gamma_1 \frac{B_p}{K_1 + B_p} + \gamma_2 \frac{B_{np}}{K_1 + B_{np}}\right) P - dP \end{aligned} \quad (4)$$

Let  $\Gamma_1 = a(\mu + \delta + \eta)(B_p - c) + (\mu + \eta)(\mu + \delta)(B_p - c + H)$ . Then One can easily check that  $\dot{I} = 0$  if  $I_1 = \frac{\alpha(B_p)}{\mu + \delta} S$ , and hence  $\dot{S} = 0$  if

$S_1 = (\mu + \eta)(\mu + \delta) \left( \frac{(B_P - c) + H}{\Gamma_1} \right) N$ . Consequently,  $I_1 = \left( \frac{a(\mu + \eta)(B_P - c)}{\Gamma_1} \right) N$ .

The third, fourth and fifth equations of (4) do not contain terms including  $S$  and  $I$  so the non-trivial values for  $B_p$  and the values of  $B_{np}$  and  $P$  that satisfy these equations of system (4) are the same as third, fourth and fifth equations of system (3) with the condition that  $B_p > c$  so that  $\alpha(B_p) \neq 0$ . That is, the equilibrium points of system (4) are:

1.  $E_3 = (S_1, I_1, m, K - m, 0)$ , where  $m$  is a positive constant such that if  $K > c$ , then  $c < m \leq K$  and the point does not exist if  $K \leq c$ .  
Special case of  $E_3$  is  $E_{31} = (S_1, I_1, K, 0, 0)$ , where  $K > c$ .
2.  $E_4 = (S_1, I_1, B_{p_4}, 0, P_4)$ , where  $B_{p_4} = B_{p_2} = \frac{dK_1}{\beta\gamma_1 - d} > 0$  is such that if  $K \leq c$ , then  $E_4$  does not exist, and if  $K > c$ , then  $c < B_{p_2} \leq K$ . Hence,  $P_4 = P_2 = \frac{r}{\gamma_1 K} (K_1 + B_{p_2})(K - B_{p_2}) > 0$ .
3.  $E^{**} = (S_1, I_1, B_p^{**}, B_{np}^{**}, P^{**})$ , exists if the following conditions are hold:
  - (i)  $B_p^{**} > c$ .
  - (ii)  $B_p^{**} \neq \frac{dK_1}{\beta\gamma_1 - d} = B_{p_4}$ . Note that the existence of  $B_p^{**}$  and  $B_{p_4}$  is contrary.
  - (iii)  $B_p^{**} \neq \frac{K_1(d - \beta\gamma_2)}{\beta(\gamma_1 + \gamma_2) - d}$ .
  - (iv)  $K > B_p^{**} + B_{np}^{**}$ .
  - (v)  $B_p^{**}, B_{np}^{**}$  and  $P^{**} > 0$ .

## 2 Linearization

Depending on the pathogenic bacteria level, the linearization of system (2) has two forms, one for system (3) when  $\alpha(B_p) = 0$ , denoted  $J$ , and one for system (4) when  $\alpha(B_p) \neq 0$ , denoted  $\hat{J}$ .

Define:  $U = r - \frac{2rB_p}{K} - \frac{rB_{np}}{K} - \frac{K_1\gamma_1 P}{(K_1 + B_p)^2}$  and  $V = r - \frac{rB_p}{K} - \frac{2rB_{np}}{K} - \frac{K_1\gamma_2 P}{(K_1 + B_{np})^2} - \theta P$ . Then:

$$J_1 = \begin{bmatrix} -\mu - \eta & 0 & 0 & 0 & 0 \\ 0 & -(\mu + \delta) & 0 & 0 & 0 \\ 0 & 0 & U & \frac{-rB_p}{K} + \theta P & \frac{-\gamma_1 B_p}{K_1 + B_p} + \theta B_{np} \\ 0 & 0 & -\frac{rB_{np}}{K} & V & \frac{-\gamma_2 B_{np}}{K_1 + B_{np}} - \theta B_{np} \\ 0 & 0 & \frac{\beta\gamma_1 K_1 P}{(K_1 + B_p)^2} & \frac{\beta\gamma_2 K_1 P}{(K_1 + B_{np})^2} & \beta \left( \frac{\gamma_1 + B_p}{K_1 + B_p} + \frac{\gamma_2 + B_{np}}{K_1 + B_{np}} \right) - d \end{bmatrix}$$

and

$$J_2 = \begin{bmatrix} -\alpha(B_p) - \mu - \eta & 0 & \frac{-aS_1H}{(B_p - c + H)^2} & 0 & 0 \\ \alpha(B_p) & -(\mu + \delta) & \frac{-aS_1H}{(B_p - c + H)^2} & 0 & 0 \\ 0 & 0 & U & \frac{-rB_p}{K} + \theta P & \frac{-\gamma_1 B_p}{K_1 + B_p} + \theta B_{np} \\ 0 & 0 & -\frac{rB_{np}}{K} & V & \frac{-\gamma_2 B_{np}}{K_1 + B_{np}} - \theta B_{np} \\ 0 & 0 & \frac{\beta\gamma_1 K_1 P}{(K_1 + B_p)^2} & \frac{\beta\gamma_2 K_1 P}{(K_1 + B_{np})^2} & \beta\left(\frac{\gamma_1 B_p}{K_1 + B_p} + \frac{\gamma_2 B_{np}}{K_1 + B_{np}}\right) - d \end{bmatrix}$$

## 2.1 Stability of the equilibrium $E_0$

The Jacobin matrix for  $E_0$  is:

$$J_0 = \begin{bmatrix} -\mu - \eta & 0 & 0 & 0 & 0 \\ 0 & -(\mu + \delta) & 0 & 0 & 0 \\ 0 & 0 & r & 0 & 0 \\ 0 & 0 & 0 & r & 0 \\ 0 & 0 & 0 & 0 & -d \end{bmatrix}$$

The eigenvalues corresponding to  $E_0$  are:  $-\mu - \eta$ ,  $-(\mu + \delta)$ ,  $-d < 0$  and  $r, r > 0$ . Since  $r > 0$ , then  $E_0$  is unstable.

## 2.2 Stability of the equilibrium $E_1$

The Jacobin matrix for  $E_1$  is:

$$J_1 = \begin{bmatrix} -\mu - \eta & 0 & 0 & 0 & 0 \\ 0 & -(\mu + \delta) & 0 & 0 & 0 \\ 0 & 0 & -\frac{r}{K} & -\frac{r}{K} & \frac{-\gamma_1 m}{K_1 + m} + \theta(K - m) \\ 0 & 0 & -\frac{r(K - m)}{K} & -\frac{r(K - m)}{K} & \frac{-\gamma_2(K - m)}{K_1 + (K - m)} - \theta(K - m) \\ 0 & 0 & 0 & 0 & \beta\left(\frac{\gamma_1 + B_p}{K_1 + B_p} + \frac{\gamma_2 + B_{np}}{K_1 + B_{np}}\right) - d \end{bmatrix}$$

The eigenvalues corresponding to  $E_1$  are:  $-\mu - \eta$ ,  $-(\mu + \delta)$ ,  $-r, 0$  and

$$\beta\left(\frac{\gamma_1 m}{K_1 + m} + \frac{\gamma_2(K - m)}{K_1 + K - m}\right) - d.$$

Hence,  $E_1$  might be stable if the following condition holds:

$$R_B = \frac{\beta}{d} \left( \frac{\gamma_1 m}{K_1 + m} + \frac{\gamma_2(K - m)}{K_1 + K - m} \right) < 1.$$

Considering the special case  $E_{11}$ , we get the following eigenvalues:  $-(\mu + \eta)$ ,  $-(\mu + \delta)$ ,  $-r, 0$  and  $\frac{\beta\gamma_2 K}{K + K_1} - d$ . Thus, if  $\frac{\beta\gamma_2 K}{d(K_1 + K)} < 1$ , then  $E_{11}$  might be stable, and if  $\frac{\beta\gamma_2 K}{d(K_1 + K)} > 1$ , then  $E_{11}$  might be unstable.

When considering the equilibrium point  $E_{12}$ , we found that the eigenvalues corresponding to  $J_1$  are:  $-(\mu + \eta)$ ,  $-(\mu + \delta)$ ,  $-r, 0$  and  $\frac{\beta\gamma_1 K}{K + K_1} - d$ . So,  $E_{12}$  might be stable if  $\frac{\beta\gamma_1 K}{d(K + K_1)} < 1$ , which is equivalent to say that  $E_{12}$  might be stable if  $K < \frac{dK_1}{\beta\gamma_1 - d} = B_{p_2}$ . But if  $E_2$  exists, then  $K > \frac{dK_1}{\beta\gamma_1 - d} = B_{p_2}$  and hence,  $E_{12}$  might be unstable whenever  $E_2$  exists.

### 2.3 Stability of $E_2$

Let  $O = r - \frac{2rB_{p_2}}{K} - \frac{K_1\gamma_1P_2}{(K_1+B_{p_2})^2}$ ,  $Q = r - \frac{rB_{p_2}}{K} - \frac{\gamma_2P_2}{K_1} - \theta P_2$  and  $L = \frac{\beta\gamma_1K_1P_2}{(K_1+B_{p_2})^2}$ , then the Jacobin matrix is:

$$J_2 = \begin{bmatrix} -\mu - \eta & 0 & 0 & 0 & 0 \\ 0 & -(\mu + \delta) & 0 & 0 & 0 \\ 0 & 0 & O & \frac{-rB_{p_2}}{K} + \theta P_2 & \frac{-d}{\beta} \\ 0 & 0 & 0 & Q & 0 \\ 0 & 0 & L & \frac{\beta\gamma_2K_1P_2}{(K_1)^2} & 0 \end{bmatrix}$$

Now,

$$\begin{aligned} \det(J_2 - \lambda I) &= (-\mu - \eta - \lambda)(-\mu - \delta - \lambda)(Q - \lambda) \left[ \frac{d}{\beta}L - \lambda(O - \lambda) \right] \\ &= (-\mu - \eta - \lambda)(-\mu - \delta - \lambda) \frac{d}{\beta}(Q - \lambda)(\lambda^2 - \lambda O + \frac{d}{\beta}L) \end{aligned}$$

Note that the equation  $(\lambda^2 - \lambda O + \frac{d}{\beta}L) = 0$  has two real solutions non of which is zero since  $\frac{d}{\beta}L > 0$ . Hence, the stability of  $E_2$  is determined by the sign of the eigenvalue  $\lambda = Q$ .

If  $Q \leq 0$ , then

$$\begin{aligned} r - \frac{rB_{p_2}}{K} - \frac{\gamma_2P_2}{K_1} - \theta P_2 &\leq 0 \\ K &\leq \frac{dK_1}{\beta\gamma_1-d} + \left( \frac{\gamma_2}{\gamma_1K_1} + \frac{\theta}{\gamma_1} \right) (K_1 + \frac{dK_1}{\beta\gamma_1-d}) (K - \frac{dK_1}{\beta\gamma_1-d}) \\ (1 - \frac{\gamma_2\beta + \theta K_1\beta}{\beta\gamma_1-d}) K &\leq \frac{dK_1}{\beta\gamma_1-d} - \frac{dK_1\beta(\gamma_2 + \theta K_1)}{(\beta\gamma_1-d)^2} \\ K &\leq \frac{dK_1}{\beta\gamma_1-d} = B_{p_2} \end{aligned}$$

which is not the case since we must have  $B_{p_2} < K$ . Thus,  $Q > 0$ , and hence  $E_2$  is unstable.

### 2.4 Stability of $E_3$

We have the following Jacobin matrix for  $E_3$ :

$$\hat{J}_3 = \begin{bmatrix} -\alpha(m) - \mu - \eta & 0 & \frac{-aS_1H}{(m-c+H)^2} & 0 & 0 \\ \alpha(m) & -(\mu + \delta) & \frac{-aS_1H}{(m-c+H)^2} & 0 & 0 \\ 0 & 0 & r - \frac{mr}{K} & \frac{-rm}{K} & \frac{-\gamma_1m}{K_1+m} + \theta(K-m) \\ 0 & 0 & -\frac{r(K-m)}{K} & -\frac{r(K-m)}{K} & \frac{-\gamma_2(K-m)}{K_1+K-m} - \theta(K-m) \\ 0 & 0 & 0 & 0 & \beta \left( \frac{\gamma_1m}{K_1+m} + \frac{\gamma_2(K-m)}{K_1+K-m} \right) - d \end{bmatrix}$$

The eigenvalues of  $\hat{J}_3$  are:  $-\alpha(m) - \mu - \eta$ ,  $-(\mu + \delta)$ ,  $-r$ ,  $0$  and  $\beta \left( \frac{\gamma_1m}{K_1+m} + \frac{\gamma_2(K-m)}{K_1+K-m} \right) - d$ . Hence,  $E_3$  might be stable if  $R_B < 1$ .



Considering the equilibrium point  $E_{31} = (S_1, I_1, K, 0, 0)$ ,  $K > c$ , we get the following eigenvalues:  $-(\alpha(K) + \mu + \eta)$ ,  $-(\mu + \delta)$ ,  $-r$ ,  $0$  and  $\frac{\beta\gamma_1 K}{K_1 + K} - d$ . Hence,  $E_{31}$  might be stable if  $\frac{\beta\gamma_1 K}{d(K_1 + K)} < 1$ .

## 2.5 Stability of $E_4$

We recall that  $E_4 = (S_1, I_1, B_{p_4}, 0, P_4)$ , where  $B_{p_4} = B_{p_2} = \frac{dK_1}{\beta\gamma_1 - d} > 0$  is such that if  $K \leq c$ , then  $E_4$  does not exist, and if  $K > c$ , then  $c < B_{p_4} \leq K$ , so that  $P_4 = P_2 = \frac{r}{\gamma_1 K} (K_1 + B_{p_2}) (K - B_{p_2}) > 0$ .

Let  $O = r - \frac{2rB_{p_2}}{K} - \frac{K_1\gamma_1 P_2}{(K_1 + B_{p_2})^2}$ ,  $Q = r - \frac{rB_{p_2}}{K} - \frac{\gamma_2 P_2}{K_1} - \theta P_2$  and  $L = \frac{\beta\gamma_1 K_1 P_2}{(K_1 + B_{p_2})^2}$ , then the Jacobin matrix corresponding to  $E_4$  is:

$$\hat{J}_4 = \begin{bmatrix} -\alpha(B_{p_4}) - \mu - \eta & 0 & \frac{-aS_1 H}{(B_{p_4} - c + H)^2} & 0 & 0 \\ \alpha(B_{p_4}) & -(\mu + \delta) & \frac{-aS_1 H}{(B_{p_4} - c + H)^2} & 0 & 0 \\ 0 & 0 & O & \frac{-rB_{p_4}}{K} + \theta P_4 & \frac{-d}{\beta} \\ 0 & 0 & 0 & Q & 0 \\ 0 & 0 & L & \frac{\beta\gamma_2 P_4}{K_1} & 0 \end{bmatrix}$$

Then,

$$\begin{aligned} \det(\hat{J}_4 - \lambda I) &= (-\alpha(B_{p_4}) - \mu - \eta - \lambda)(-\mu - \delta - \lambda)(Q - \lambda) \left[ \frac{d}{\beta} L - \lambda(O - \lambda) \right] \\ &= (-\mu - \lambda)(-\mu - \delta - \lambda) \frac{d}{\beta} (Q - \lambda)(\lambda^2 - \lambda O + \frac{d}{\beta} L) \\ &= \det(J_2 - \lambda I) \end{aligned}$$

Hence, and is shown in Section 2.3, none of the eigenvalues is zero, and one of the eigenvalue, namely  $Q$ , is positive. So,  $E_4$  is unstable.

For the equilibrium points  $E^*$ ,  $E^{**}$  we lack exact expressions for the equilibrium quantities, and so the local stability is difficult to find analytically.

### 3 Existence of Equilibria with shedding

In this section, we determine the equilibrium points of the model system when  $\xi \neq 0$ , and then perform stability analysis of the equilibria. Since  $R = N - S - I$ , then the third equation of system (1) is not necessary, leaving us with the following system:

$$\begin{aligned}
\dot{S} &= -\alpha(B_p)S - \mu S + \mu N + \eta R \\
\dot{I} &= \alpha(B_p)S - \mu I - \delta I \\
\dot{B}_p &= rB_p \left(1 - \frac{B_p + B_{np}}{K}\right) - \gamma_1 \frac{B_p}{K_1 + B_p} P + \xi I + \theta(B_{np}, P) \\
\dot{B}_{np} &= rB_{np} \left(1 - \frac{B_p + B_{np}}{K}\right) - \gamma_2 \frac{B_{np}}{K_1 + B_{np}} P + \xi I - \theta(B_{np}, P) \\
\dot{P} &= \beta \left( \gamma_1 \frac{B_p}{K_1 + B_p} + \gamma_2 \frac{B_{np}}{K_1 + B_{np}} \right) P - dP + \phi \xi I
\end{aligned} \tag{5}$$

If  $\alpha(B_p) = 0$ , then we will have the same equilibrium points  $E_0, E_1, E_2$  and  $E^*$  as in Section 1, with the same conditions.

If  $B_p > c$ , then  $\alpha(B_p) \neq 0$ , and hence at steady state system (5) reduces to:

$$\begin{aligned}
0 &= -\alpha(B_p)S - \mu S - \eta S + \mu N + \eta N - \eta I \\
0 &= \alpha(B_p)S - \mu I - \delta I \\
0 &= rB_p \left(1 - \frac{B_p + B_{np}}{K}\right) - \gamma_1 \frac{B_p}{K_1 + B_p} P + \xi I + \theta B_{np} P \\
0 &= rB_{np} \left(1 - \frac{B_p + B_{np}}{K}\right) - \gamma_2 \frac{B_{np}}{K_1 + B_{np}} P + \xi I - \theta B_{np} P \\
0 &= \beta \left( \gamma_1 \frac{B_p}{K_1 + B_p} + \gamma_2 \frac{B_{np}}{K_1 + B_{np}} \right) P - dP + \phi \xi I
\end{aligned} \tag{6}$$

Then solving equation (2) of (6) for  $I$ , one has  $I = \frac{\alpha(B_p)S}{\mu + \eta}$ , and hence, and by solving equation (1) of (6), one can easily check that  $S = S_1 = (\mu + \eta)(\mu + \delta) \frac{(B_p^{***} - c) + H}{\Gamma_1} N$ .

Thus,  $I = I_1 = \left( \frac{a(\mu + \eta)(B_p^{***} - c)}{\Gamma_1} \right) N$ , where

$\Gamma_1 = a(\mu + \delta + \eta)(B_p^{***} - c) + (\mu + \eta)(\mu + \delta)(B_p^{***} - c + H)$ . Noting that these are the same formulas for  $S$  and  $I$  in system (4) at steady state.

By solving the other three equation of system (6), we will prove that system (6) has only one equilibrium point, namely  $E^{***} = (S_1, I_1, B_p^{***}, B_{np}^{***}, P^{***})$  which exists if the following condition holds:

$$\gamma_1 \frac{B_p^{***}}{K_1 + B_p^{***}} + \gamma_2 \frac{B_{np}^{***}}{K_1 + B_{np}^{***}} < \frac{d}{\beta},$$

where  $P^{***} = -\phi\xi I_1 \left[ \frac{(K_1+B_p^{***})(K_1+B_{np}^{***})}{\Gamma_2} \right]$ , where

$$\Gamma_2 = \beta\gamma_1 B_p^{***}(K_1 + B_{np}^{***}) + \beta\gamma_2 B_{np}^{***}(K_1 + B_p^{***}) - d(K_1 + B_p^{***})(K_1 + B_{np}^{***}).$$

In order to have a well-defined and positive value for  $P^{***}$ ,  $\Gamma_2$  must be negative. That is, the value of  $P$  provides a condition for  $B_p^{***}$  and  $B_{np}^{***}$ .

Now,  $\Gamma_2 < 0$  if

$$\beta\gamma_1 B_p(K_1 + B_{np}) + \beta\gamma_2 B_{np}(K_1 + B_p) < d(K_1 + B_p)(K_1 + B_{np}).$$

Dividing both sides by:  $(K_1 + B_p)(K_1 + B_{np})$ , to get:  $\gamma_1 \frac{B_p}{K_1+B_p} + \gamma_2 \frac{B_{np}}{K_1+B_{np}} < \frac{d}{\beta}$ .

Then, and by substituting the values of  $S, I$  and  $P$  in equation (4) of system (6), we get

$$\begin{aligned} 0 = & \frac{r}{K} B_{np}(K - B_p - B_{np}) + \frac{\xi \mu N a (B_p - c)}{(\mu + \delta)((a + \mu)(B_p - c) + \mu H)} \\ & + \phi \xi \mu N a \left[ \frac{\gamma_2 B_{np}(B_p - c)(K_1 + B_p)}{(\mu + \delta)(a + \mu)(B_p - c) + \mu H} \right] \frac{1}{\Gamma_2} \\ & + \theta K \phi \xi \mu N a \left[ \frac{B_{np}(B_p - c)(K_1 + B_p)(K_1 + B_{np})}{(\mu + \delta)((a + \mu)(B_p - c) + \mu H)} \right] \frac{1}{\Gamma_2} \end{aligned} \quad (17)$$

Consequently,

$$\begin{aligned} 0 = & K \phi \xi \mu N a (B_p - c)(K_1 + B_p) [\gamma_2 B_{np} + \theta (K_1 + B_{np})] \\ & + \Gamma_2 \left( r B_{np}(K - B_p - B_{np})(\mu + \delta)[(a + \mu)(B_p - c) + \mu H] + \xi K \mu N a (B_p - c) \right) \end{aligned} \quad (18)$$

Using Mathematica to solve equation (18), we found out that it is a cubic equation of  $B_p$  which has three solutions. Only one of these solutions is a real solution, say  $B_p^{***}$ , which is in-terms of  $B_{np}$ .

Substitute  $B_p^{***}, I$  and  $P^{***}$  in equation (3) of system (6) to get an equation in terms of  $B_{np}$  only, then solve the resulting equation to get the value of  $B_{np}^{***}$ . The exact formula of  $B_{np}^{***}$  is so complicated, and since the other four coordinates of  $E^{***}$  depend on  $B_{np}^{***}$ , exact formulas of these variables are not given.

## 4 Linearization

According to the level of pathogenic bacteria, we will have two linearizations of system (5). First when  $\alpha(B_p) = 0$ , denoted by  $\mathcal{J}$  and the other when  $\alpha(B_p) \neq 0$ ,

denoted by  $\hat{\mathcal{J}}$ .

Set:  $U = r - \frac{2rB_p}{K} - \frac{rB_{np}}{K} - \frac{K_1\gamma_1P}{(K_1+B_p)^2}$  and  $V = r - \frac{rB_p}{K} - \frac{2rB_{np}}{K} - \frac{K_1\gamma_2P}{(K_1+B_{np})^2} - \theta P$ .

Then:

$$\mathcal{J} = \begin{bmatrix} -\mu & 0 & 0 & 0 & 0 \\ 0 & -(\mu + \delta) & 0 & 0 & 0 \\ 0 & \xi & U & \frac{-rB_p}{K} + \theta P & \frac{-\gamma_1B_p}{K_1+B_p} + \theta B_{np} \\ 0 & \xi & -\frac{rB_{np}}{K} & V & \frac{-\gamma_2B_{np}}{K_1+B_{np}} - \theta B_{np} \\ 0 & \phi\xi & \frac{\beta\gamma_1K_1P}{(K_1+B_p)^2} & \frac{\beta\gamma_2K_1P}{(K_1+B_{np})^2} & \beta(\frac{\gamma_1+B_p}{K_1+B_p} + \frac{\gamma_2+B_{np}}{K_1+B_{np}}) - d \end{bmatrix},$$

Letting  $\mathcal{J}_i$  be the Jacobian matrix corresponding to the equilibrium point  $E_i$ ,  $i = 0, 1$  or  $2$ , one can easily check that the eigenvalues of  $\mathcal{J}_i$  are the same as those for  $J_i$ . Consequently, the stability of the equilibrium points of system (5) has been already stated in section 2.

The Jacobian matrix corresponding to system (6) is

$$\hat{\mathcal{J}} = \begin{bmatrix} -\alpha(B_p) - \mu & 0 & \frac{-aS_1H}{(B_p-c+H)^2} & 0 & 0 \\ \alpha(B_p) & -(\mu + \delta) & \frac{-aS_1H}{(B_p-c+H)^2} & 0 & 0 \\ 0 & \xi & U & \frac{-rB_p}{K} + \theta P & \frac{-\gamma_1B_p}{K_1+B_p} + \theta B_{np} \\ 0 & \xi & -\frac{rB_{np}}{K} & V & \frac{-\gamma_2B_{np}}{K_1+B_{np}} - \theta B_{np} \\ 0 & \phi\xi & \frac{\beta\gamma_1K_1P}{(K_1+B_p)^2} & \frac{\beta\gamma_2K_1P}{(K_1+B_{np})^2} & \beta(\frac{\gamma_1+B_p}{K_1+B_p} + \frac{\gamma_2+B_{np}}{K_1+B_{np}}) - d \end{bmatrix},$$

Since we lack exact expressions for the coordinates of  $E^{***}$ , the stability of this equilibrium point is difficult to find analytically.
